# Supplementary material
Source: PubMed Central journal article supplement (PMC2486413)
Supplement: NIHMS45021-supplement-supp.pdf [file NIHMS45021-supplement-supp.pdf]

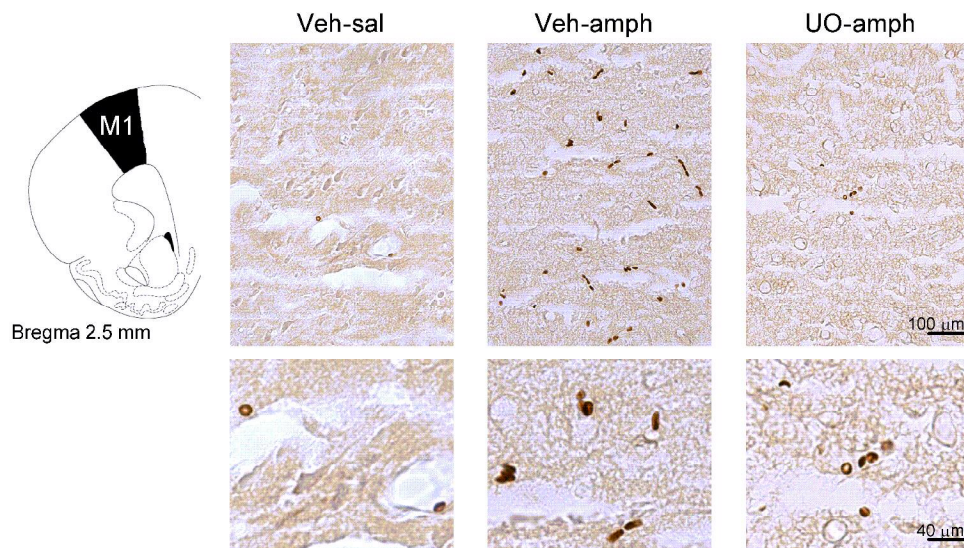

## Supplementary Material

**Left. Schematic representation of the primary motor cortex (M1) in a rat coronal brain section at Bregma level +2.5 mm. Right. Amphetamine-induced phosphorylation of ERK1/2 immunoreactivity (ir) in M1 following pretreatment with UO126.**

**Immunohistochemistry for phospho-ERK1/2 clearly demonstrates an increase of phospho-ERK1/2-ir after amphetamine (amph, 10 mg/kg, ip) which is blocked by UO126 (UO, 2.5 nnol, icv) pretreatment. Thus, after icv injection UO seems to penetrate the tissue in sufficient concentration to block the phosphorylation of ERK1/2; saline (sal), vehicle (veh, 4% DMSO, icv); for details, see Materials and Methods.**

184x125mm (600 x 600 DPI)
